# Supplementary material for: Vitamin D Deficiency and Pain: Clinical Evidence of Low Levels of Vitamin D and Supplementation in Chronic Pain States
Source: Springer Nature journal article supplement (doi:10.1007/s40122-015-0036-8), 2015-04-28
Supplement: MOESM2 [file 40122_2015_36_MOESM2_ESM.pdf]

- In chronic pain, clinical studies of vitamin D supplementation with known vitamin D deficiency have shown mixed results in improving pain scores.
- Evidence of the effectiveness of vitamin D supplementation in treatment of chronic pain conditions from double-blind randomized-controlled trials (RCTs) is examined.
- The scientific evidence for the use of vitamin D as a treatment option for chronic pain is limited at present due to low quality designs, and due to the lack of RCTs.
- A trend appears in a positive direction indicating a beneficial effect of vitamin D over placebo in chronic pain.
- More focused research involving large RCTs is necessary.

This summary slide represents the opinions of the authors. No funding or sponsorship was received for this study or compilation of this article. For a full list of acknowledgments and conflicts of interest for all authors of this article, please see the full text online. Copyright © The Author(s) 2015. Creative Commons Attribution Noncommercial License (CC BY-NC).
